# Supplementary material
Source: PubMed Central journal article supplement (PMC7685756)
Supplement: jci-130-140046-s413.pdf [file jci-130-140046-s413.pdf]

# Supplementary Information

## A Generation of $\beta Kcnj11^{-/-}$ mice

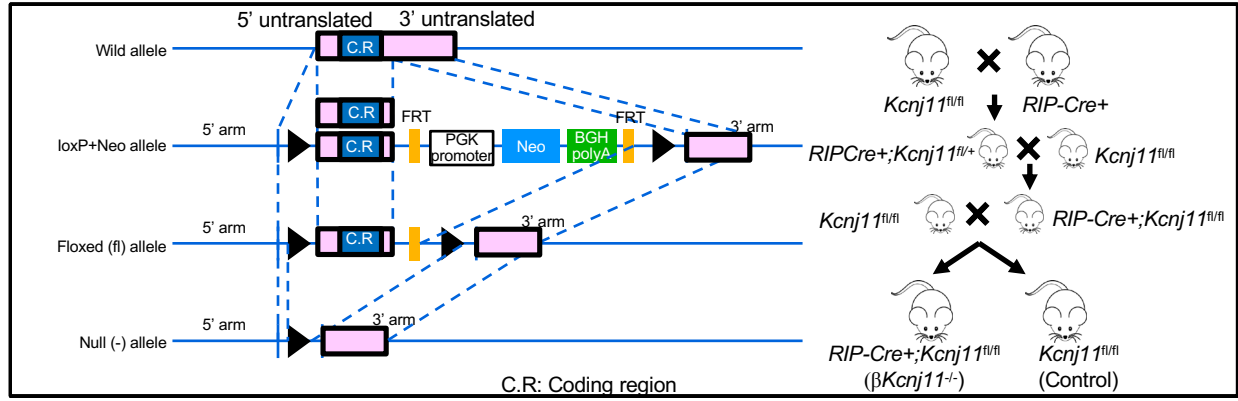

## B Gene expression

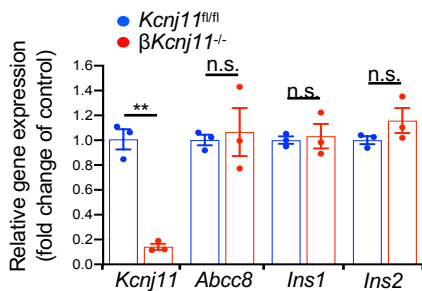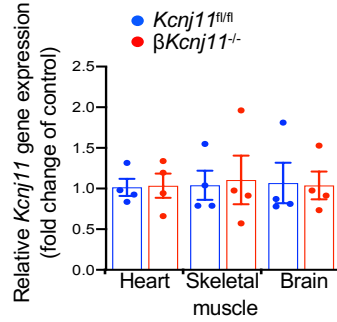

## C Islet morphology

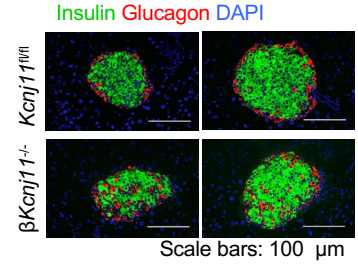

## D Insulin content

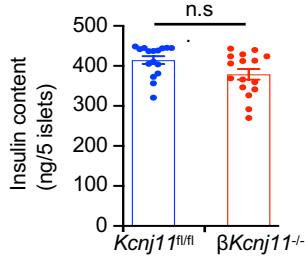

## E ipGTT

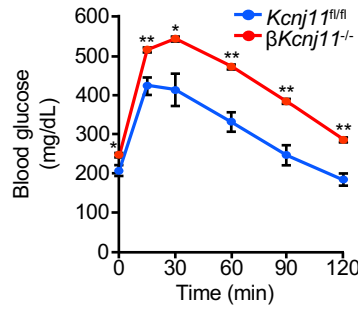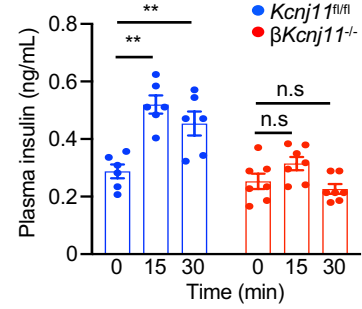

## F oGTT

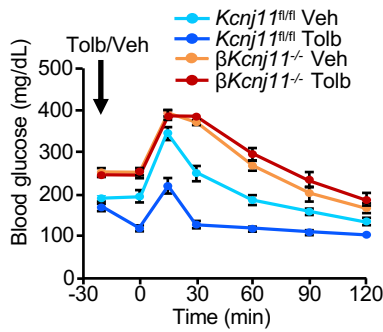

## G Perfusion of pancreas

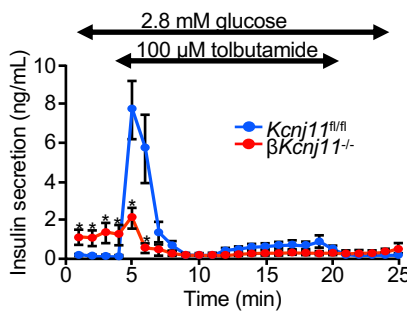

## H Glucagon

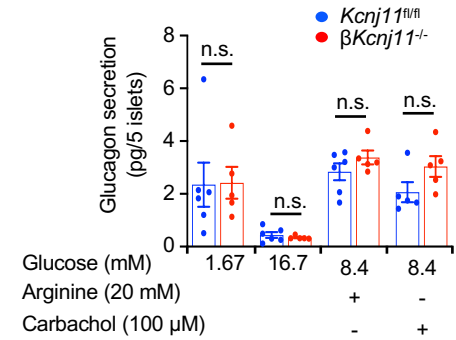

**Supplementary Figure 1.**

(A) Generation of  $\beta Kcnj11^{-/-}$  mice. *Left*, Schematic diagram of *Kcnj11* gene targeting. The targeting vector contained phosphoglycerol kinase (PGK) promoter/a neomycin (Neo) resistant selection cassette flanked by flippase recognition target (FRT) sites and loxP sites on either side of the exon of the *Kcnj11* gene. The neomycin resistant (Neo<sup>r</sup>) cassette (flanked by FRT sites) was added to the targeting vector for positive selection, and was deleted in mice using FLP-FRT recombination system. Targeted allele, floxed allele after flippase recombination and final allele with the targeted region deleted are shown. *Right*, Production of  $\beta Kcnj11^{-/-}$  mice by crossing *Kcnj11<sup>fl/fl</sup>* mice with RIP-Cre+; *Kcnj11<sup>fl/fl</sup>* mice.

(B) Expressions of *Kcnj11*, *Abcc8*, *Ins1*, and *Ins2* genes in the islets and *Kcnj11* in the brain, heart, and skeletal muscles assessed by qPCR (n = 3 for each). Expression of each gene was normalized by that of *Gapdh* and presented as fold change of control.

(C) Immunohistochemistry of the islets. Green, insulin; Red, glucagon.

(D) Insulin content of the islets (n = 16 for both groups).

(E) Intraperitoneal(ip) glucose tolerance test. *Left*, blood glucose. *Right*, plasma insulin (n = 7 for both groups).

(F) oGTT following tolbutamide (Tolb) administration. Tolb (50 mg/kg) was orally administered to 6 h-fasted mice 20 min prior to glucose challenge (1.5 g/kg) (n = 6 per group). Veh, vehicle (0.5% carboxymethyl cellulose).

(G) Effects of Tolb on insulin secretion from perfused pancreases in the presence of 2.8 mM glucose. Basal insulin secretion in  $\beta Kcnj11^{-/-}$  mice was significantly elevated compared to control (n = 4 for both groups).

(H) Glucagon secretion from the islets at high glucose (16.7 mM), low glucose (1.67 mM), and arginine or carbachol at 8.4 mM glucose (n = 5-6 for each condition).

Statistical analyses were performed by 2-tailed Student's unpaired t-test for (B), (D), and (H) or by 2-way ANOVA followed by Dunnett's post hoc test for (E), (F), and (G).

Data represent mean  $\pm$ SEM. \*p < 0.05, \*\*p < 0.01

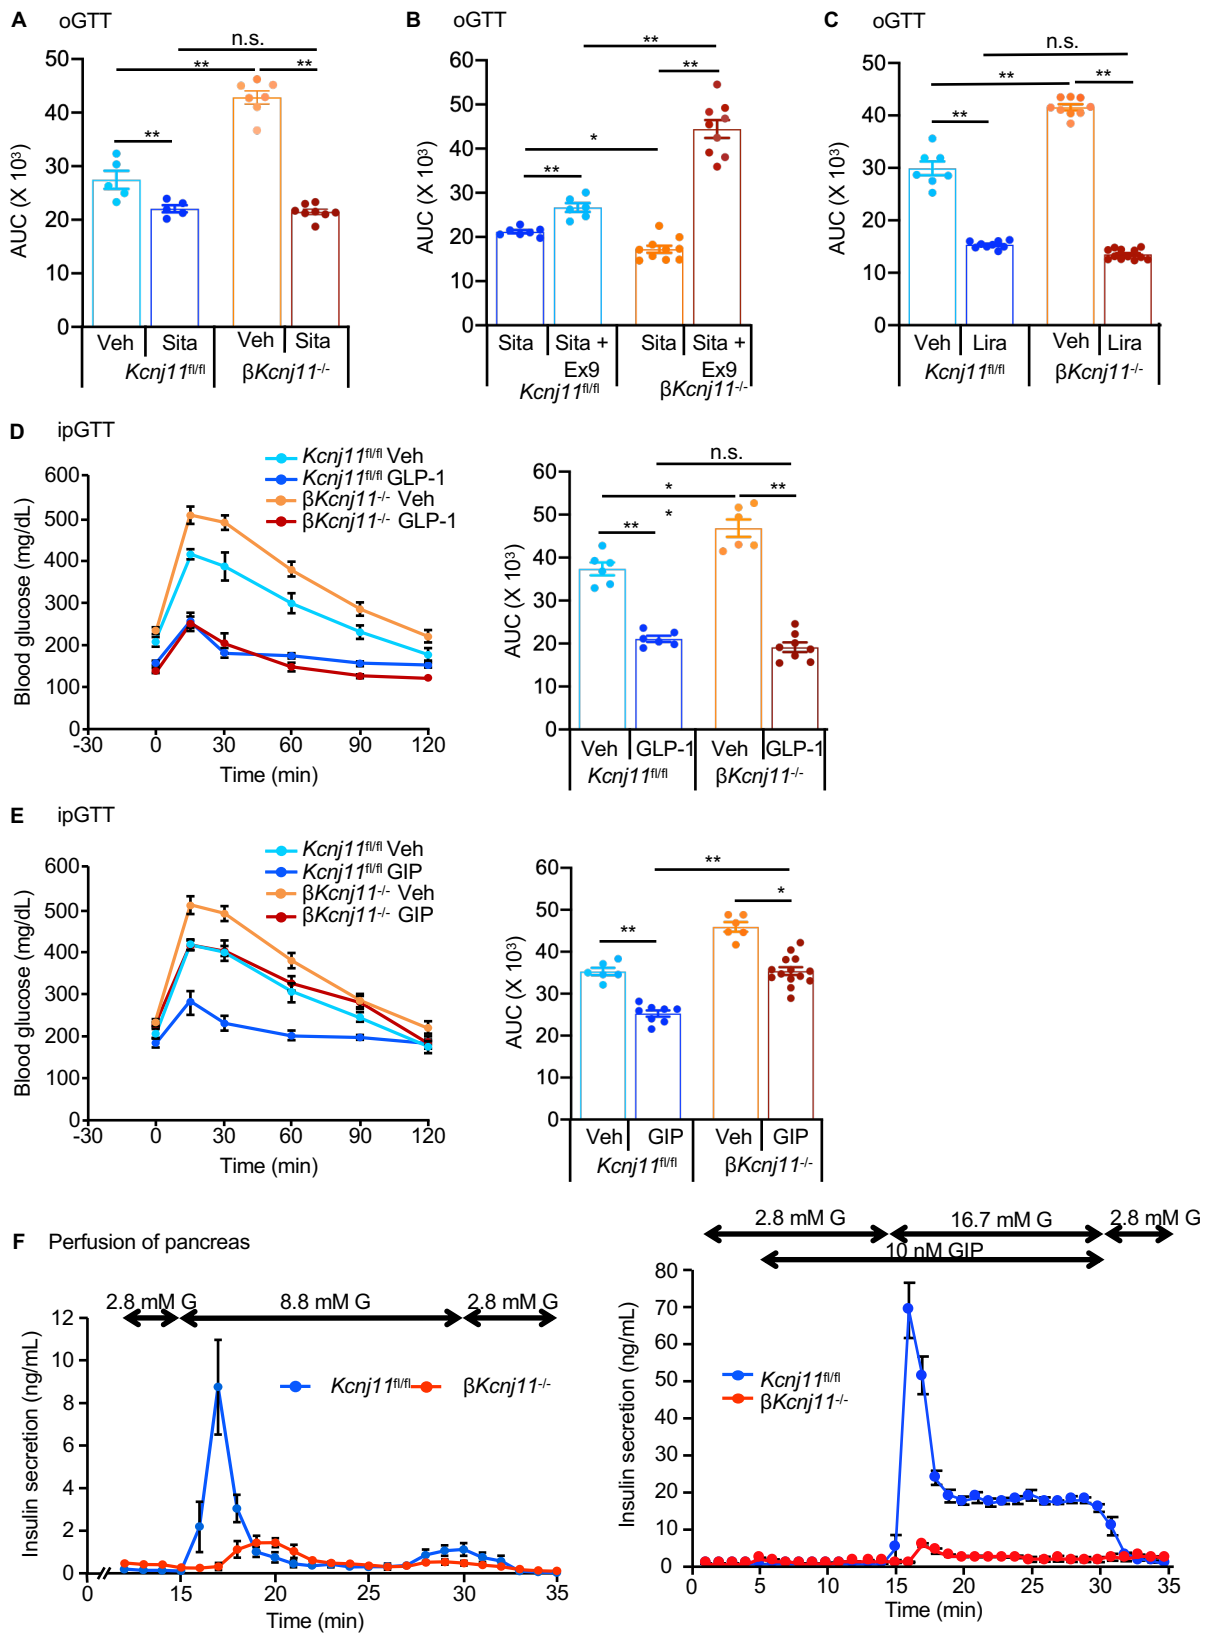

**Supplementary Figure 2.**

(A) AUC during oGTT following sitagliptin (Sita) administration in Figure 2A (n = 5-8 per group).

(B) AUC during oGTT following sitagliptin (Sita) and exendin-9 (Ex9) administration in Figure 2D (n = 6-10 per group).

(C) AUC during oGTT following liraglutide (Lira) administration in Figure 2E (n = 7-12 per group).

(D) ipGTT following exogenous administration of GLP-1 (left) and AUC (right) (n = 6-8 per group).

(E) ipGTT following exogenous administration of GIP (left) and AUC (right) (n = 6-14 per group).

(F) Effect of glucose alone on insulin secretion from perfused pancreases (n = 4 for both groups).

(G) Effect of high GIP concentration (10 nM) on insulin secretion from perfused pancreases (n = 4 for both groups).

GLP-1 or GIP (100 µg/kg, each) was intraperitoneally administered to mice 20 min before glucose challenge in (D) and (E). Veh, vehicle (water); AUC, area under the curve. Mice were fasted overnight before perfusion experiments commenced in (F) and (G).

Statistical analyses were performed by 2-way ANOVA followed by Tukey's post hoc test. Data represent mean ±SEM. \*p < 0.05, \*\*p < 0.01

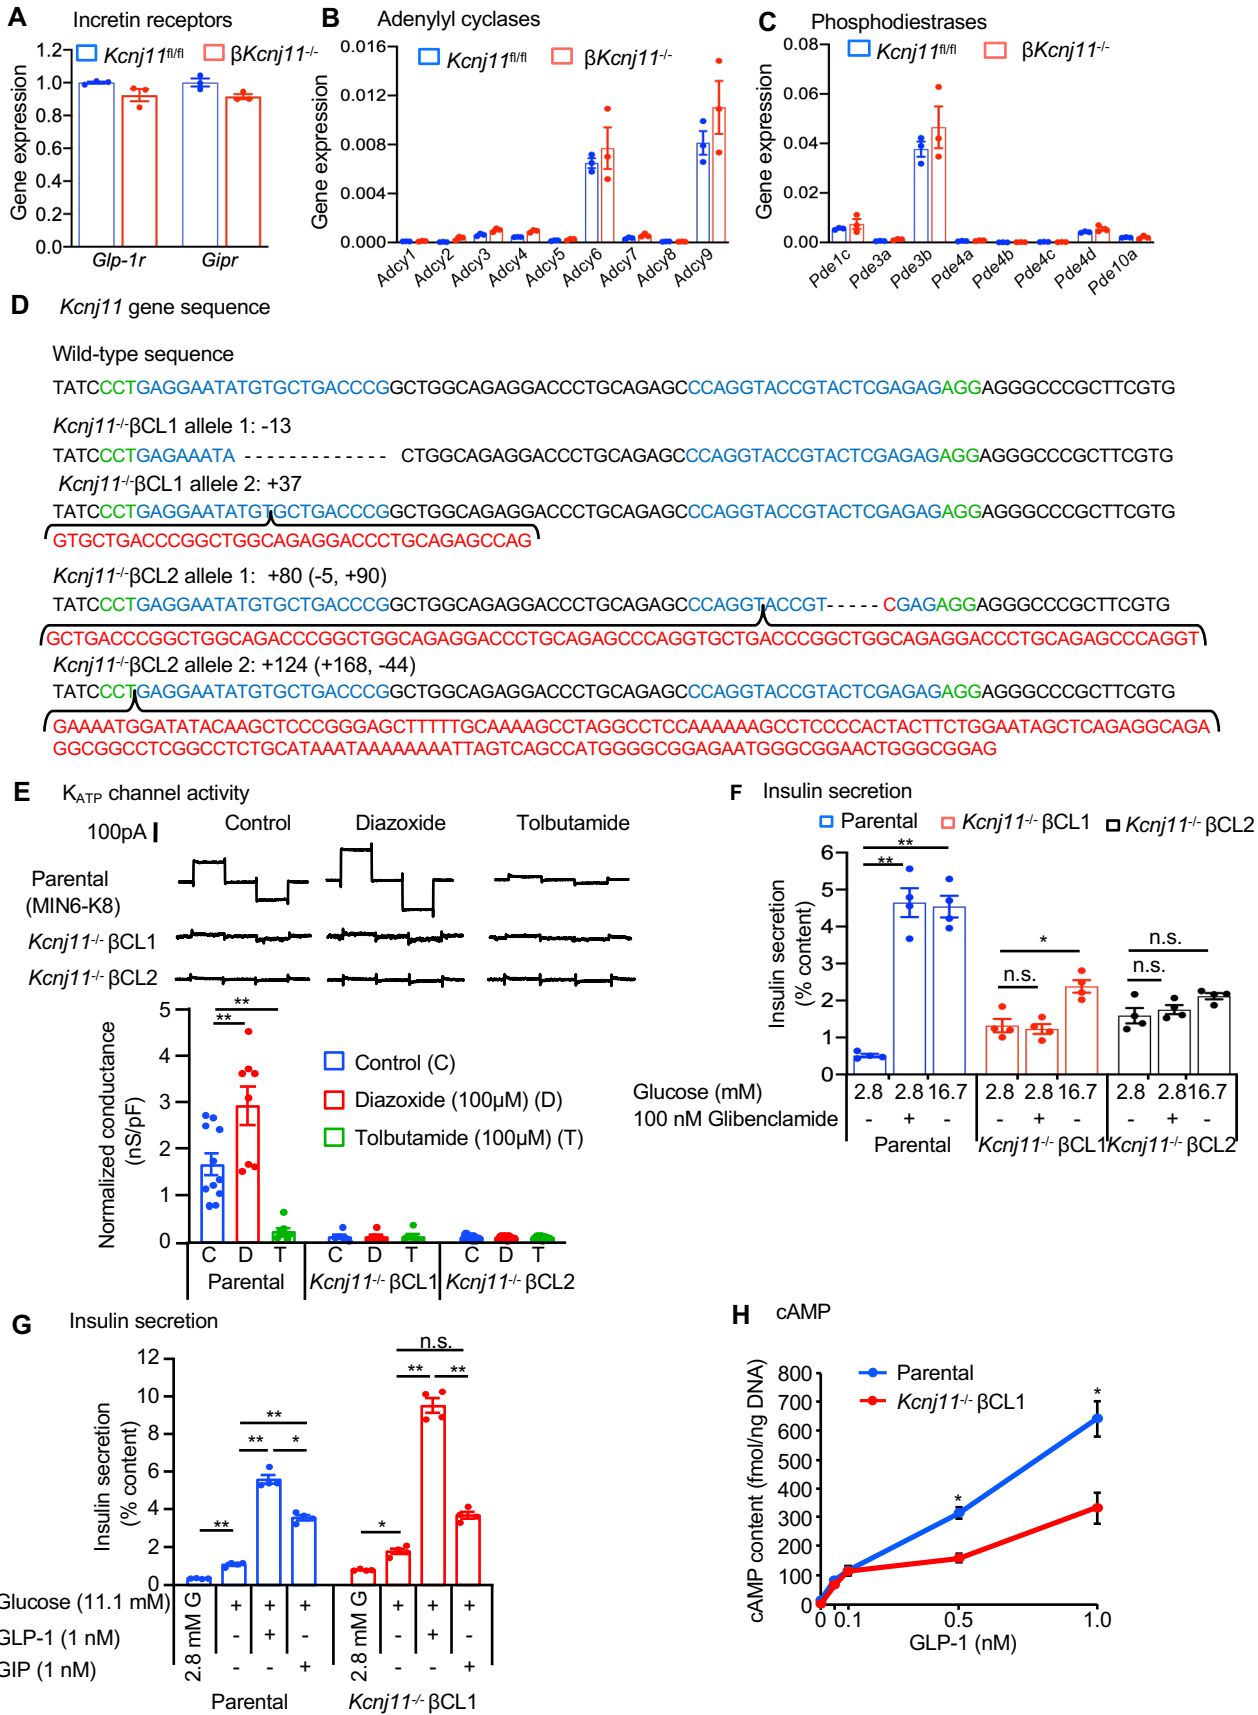

**I** PKC activity

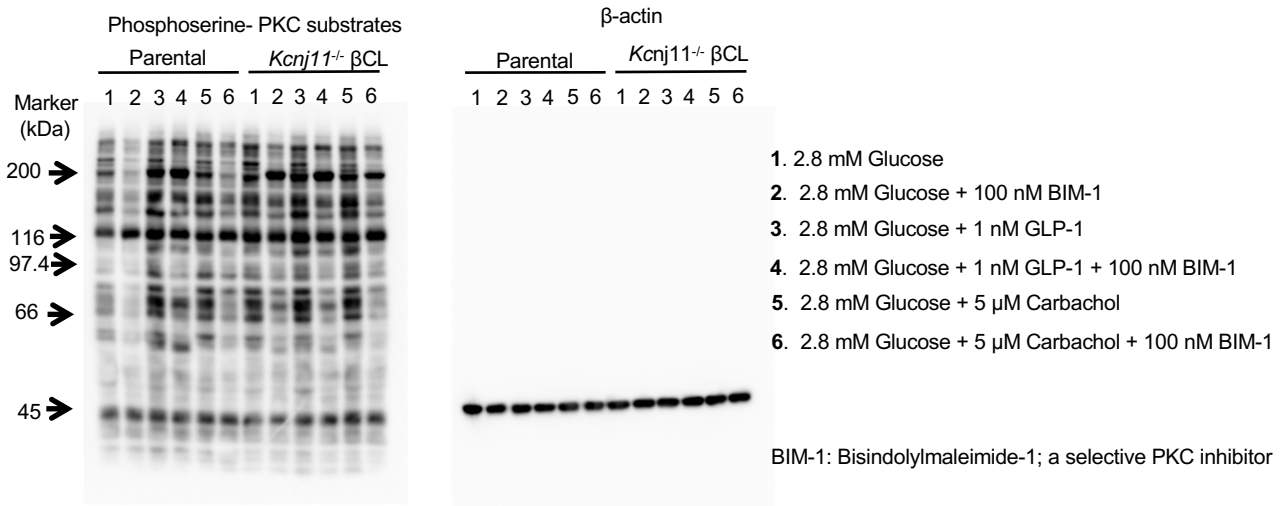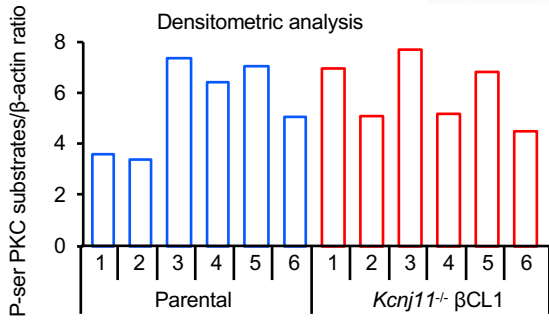

**J** Intracellular calcium

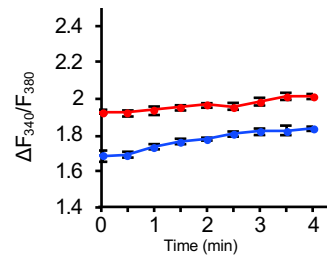

**K** Gs and Gq protein expression

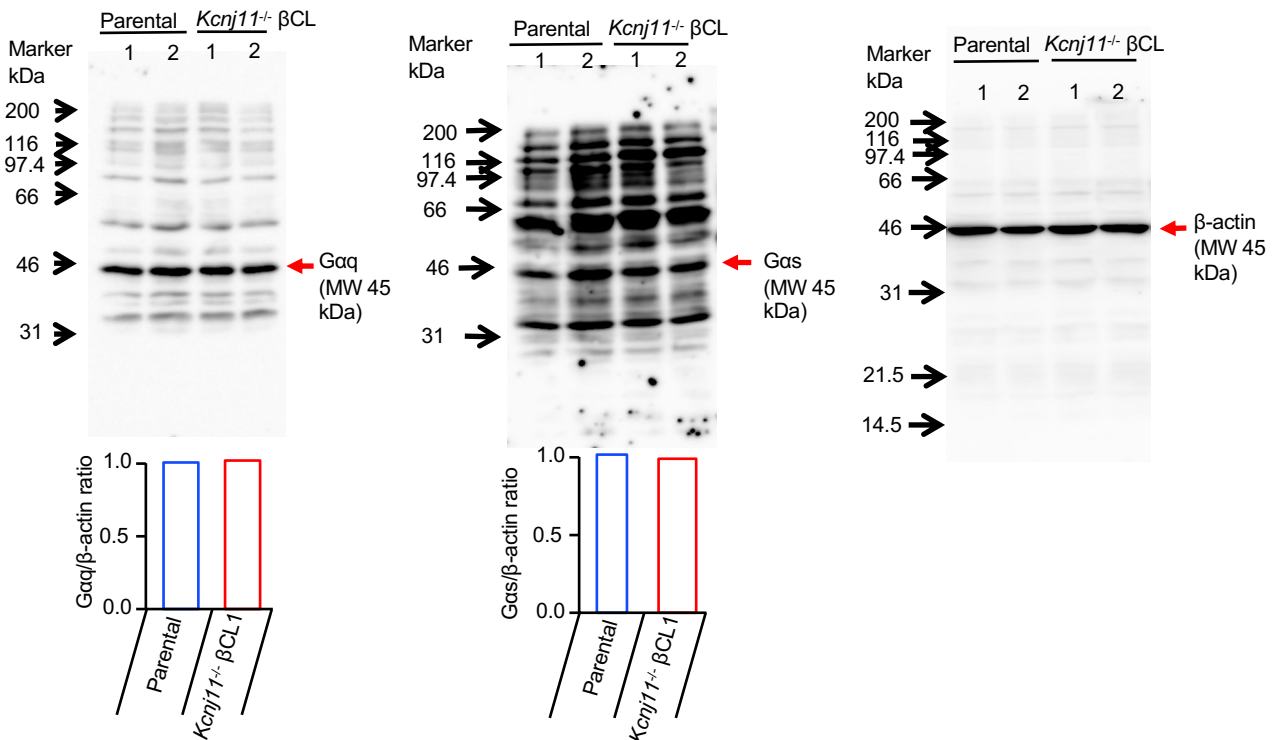

**Supplementary Figure 3.** Expressions of *Glp-1r* and *Gipr* (A), adenylyl cyclases (*Adcy*) (B), and phosphodiesterases (*Pde*) (C) in pancreatic islets assessed by qPCR (n = 3 for both mouse groups for each gene expression). Expression of gene was normalized by that of *Gapdh* and presented as fold change of control (A). Expression of gene was normalized by that of *Gapdh* (B, C).

(D) Schematic DNA sequencing of two isogenic mutant *Kcnj11* in cell lines (designated *Kcnj11*<sup>-/-</sup> βCL1 and 2) derived from parental MIN6-K8. Blue letters, dashed line, and red letters indicate guide RNAs, deleted bases, and inserted bases, respectively. Protospacer adjacent motif (PAM) is indicated by green letters. The mutations are therefore indels generating frame shifts.

(E) Whole-cell K<sub>ATP</sub> channel activity of parental cell line (MIN6-K8), *Kcnj11*<sup>-/-</sup> βCL1, and *Kcnj11*<sup>-/-</sup> βCL2. *Top*, Representative trace recorded under control conditions and after addition of the K<sub>ATP</sub> channel activator diazoxide and the inhibitor tolbutamide, respectively. *Lower*, Histograms summarizing conductance under control conditions (blue) and in the presence of diazoxide (red) and tolbutamide (green) in parent control cells and the two K<sub>ATP</sub> channel-deficient cell lines (n = 6-11 for each condition).

(F) Glibenclamide-induced insulin secretion from parental cell line (MIN6-K8), *Kcnj11*<sup>-/-</sup> βCL1, and *Kcnj11*<sup>-/-</sup> βCL2 (n = 4 for each).

(G) Incretin-induced insulin secretion from *Kcnj11*<sup>-/-</sup> βCL1 (n = 4 for each).

(H) GLP-1-induced cAMP production. GLP-1 concentrations: 0, 0.5, 0.1, 0.5, and 1 nM (n = 6-7 for each point).

(I) Western blot analysis of phosphoserine PKC substrates in β-cell lines. *Upper*, Representative blots. *Lower*, Densitometric analysis of the relative abundance of phosphoserine PKC substrates. Mean of the results from two independent experiment is shown. Samples (lane 1-6) for each cell line were prepared from whole cell lysates. 7.5% polyacrylamide gel was used.

(J) Basal [Ca<sup>2+</sup>]<sub>i</sub> in the presence of 2.8 mM glucose (n = 6 for each).

(K) Western blot analysis of *Gαq* or *Gαs* in β-cell lines. *Upper*, Representative blots. *Lower*, Densitometric analysis of the relative abundance of *Gαq* or *Gαs* proteins. Mean of the results from two independent experiment is shown. Samples (1 and 2) for each cell line were prepared from whole cell lysates in two independent experiments. Mean of the two results (1 and 2) is shown. 10% polyacrylamide gel was used for *Gαq* and *Gαs* and while 12% gel was used for β-actin. Antibody dilution: *Gαq* and *Gαs* (1:250), β-actin (1:1000).

Statistical analyses were performed by 2-tailed student's unpaired t-test for (A), (B), (C) or by 2-way ANOVA followed by Dunnett's for (E), (F), and (H) or Tukey's post hoc test for (G). Data represent mean  $\pm$ SEM. \* $p < 0.05$ , \*\* $p < 0.01$



**A** mNG-G $\gamma$ -IRES-Gaq-mTq2 FRET sensor

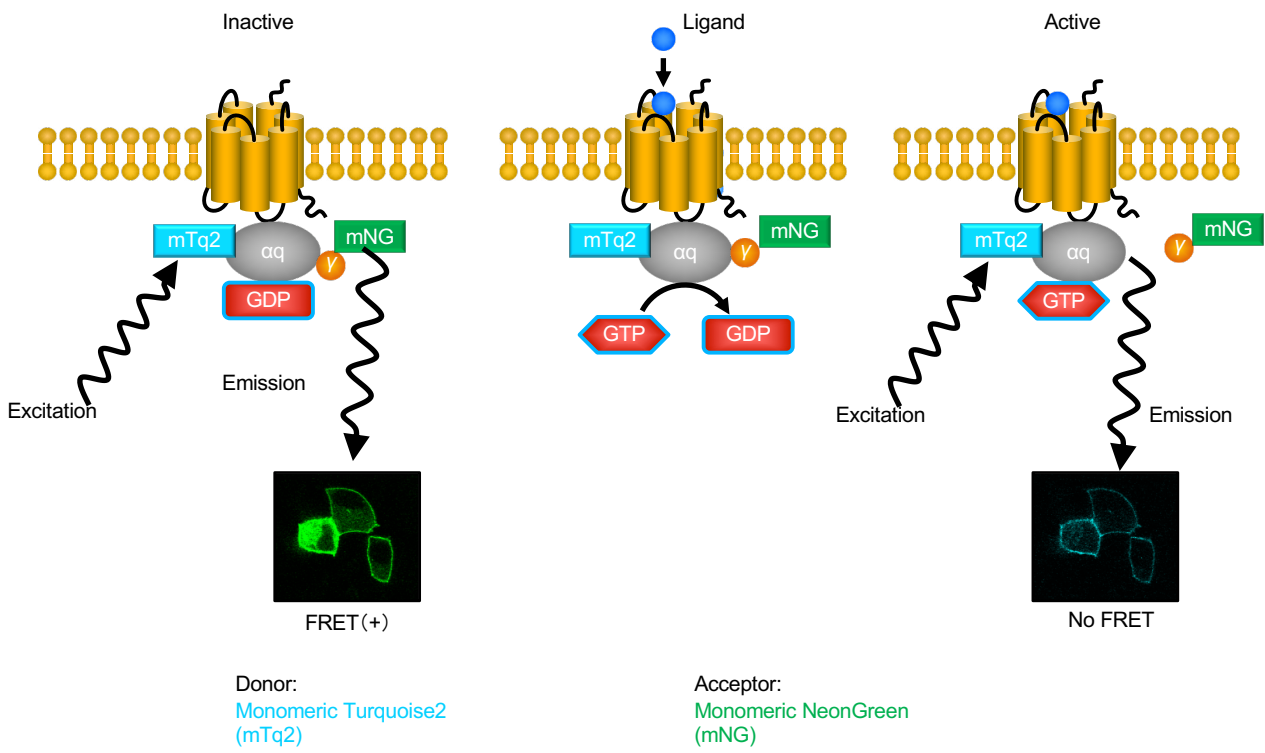

**Supplementary Figure 4.**

Schematic presentation of the principle of the Gq FRET sensor. The plasmid containing the Gq-specific FRET sensor mNG-G $\gamma$ -IRES-G $\alpha$ q-mTq2 (48) in which the CFP variant Turquoise 2 (mTq2) as the donor and mNeonGreen (mNG) as the acceptor are attached to G $\alpha$ q and G $\gamma$ , respectively, was transfected into parental MIN6-K8 and *Kcnj11*<sup>-/-</sup>  $\beta$ CL1. In the absence of ligands, the GDP-form of G $\alpha$ q and G $\gamma$  associate with each other in the inactive state of Gq that causes FRET (left). Upon ligand binding to the respective GqPCR, GDP bound to G $\alpha$ q is replaced with GTP (middle), and then the GTP-form of G $\alpha$ q dissociates from G $\gamma$  in the active state of Gq that does not cause FRET due to lack of transfer of resonance energy from mTq2 to mNG (right). Imaging was performed as described previously (74). Note: the  $\beta$ -subunit (G $\beta$ ) is not required to monitor Gq activation status in this FRET system (49).

**A** Chronic Tolb treatment of wild-type mouse islets

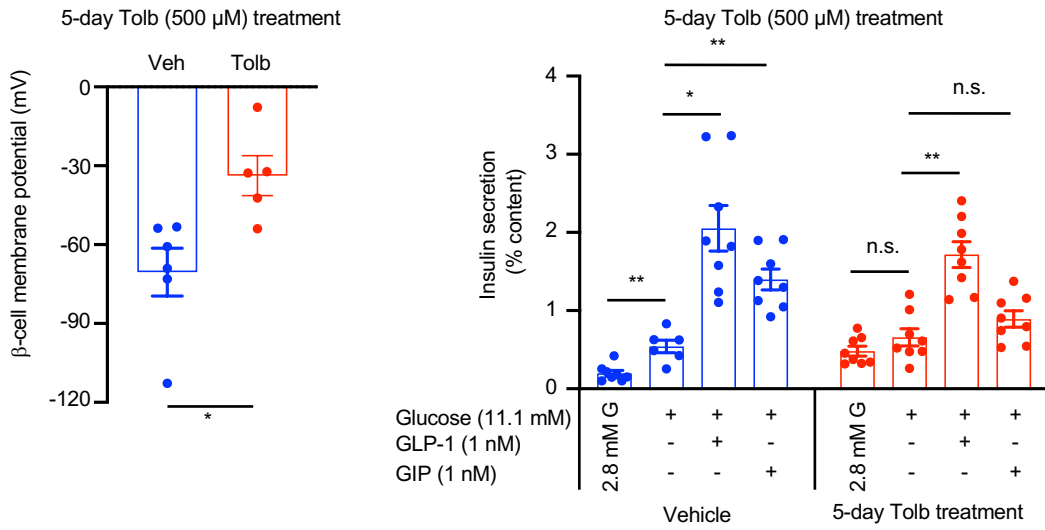

**B** Acute Tolb treatment of wild-type mouse islets

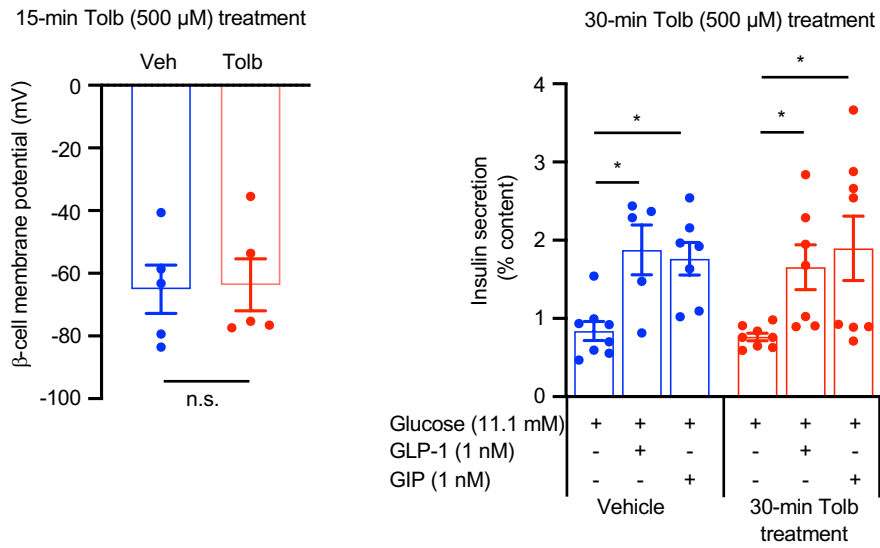

**Supplementary Figure 5.**

**(A)** Effects of chronic tolbutamide (500  $\mu$ M) treatment on membrane potential of primary  $\beta$ -cells (left) and incretin-induced insulin secretion (IIIS) from islets (right) of wild-type mice. The islets were cultured in tolbutamide (500  $\mu$ M) for 5 days (n = 5 for each condition for membrane potential; n = 6-8 for each condition for insulin secretion). G, glucose; Tolb, tolbutamide.

**(B)** Effects of acute tolbutamide (500  $\mu$ M) treatment on membrane potential of primary  $\beta$ -cells (left) and IIIS from islets (right) of wild-type (B6) mice. Primary  $\beta$ -cells were incubated with tolbutamide (500  $\mu$ M) for 15 min before measurement of the membrane potential, and the islets were incubated with tolbutamide (500  $\mu$ M) for 30 min before measurement of insulin secretion (n = 5 for each condition for membrane potential; n = 6-8 for each condition for insulin secretion). Tolb, tolbutamide.

Statistical analyses were performed by 2-tailed Student's unpaired t-test for **(A, left)** and **(B, left)** or by 2-way ANOVA followed by Tukey's post hoc test for **(A, right)** and **(B, right)**. Data represent mean  $\pm$ SEM. \*p < 0.05, \*\*p < 0.01

**A** Calcium imaging of non-diabetic human islets

5.5 mM glucose, 3 days

16.7 mM glucose, 3 days

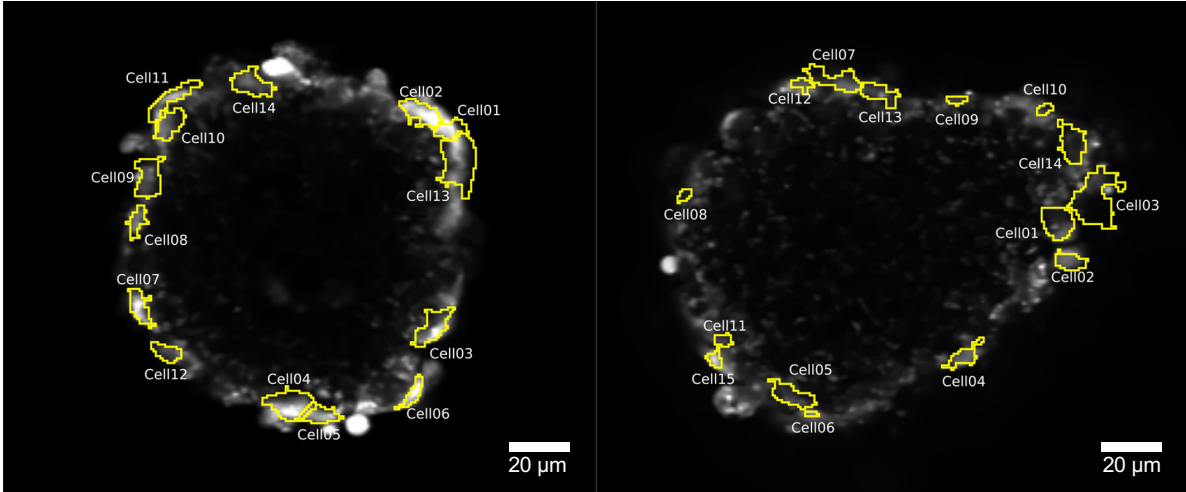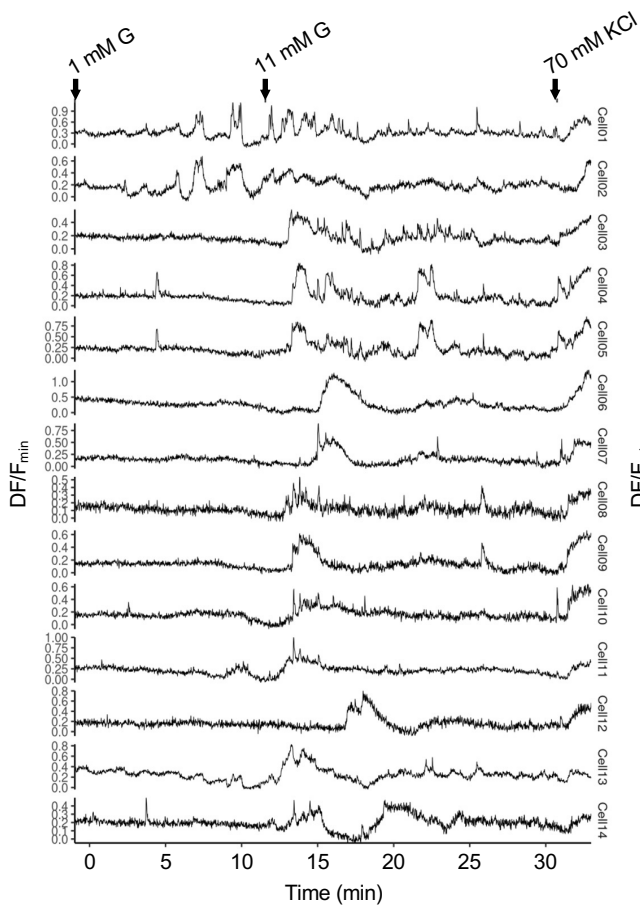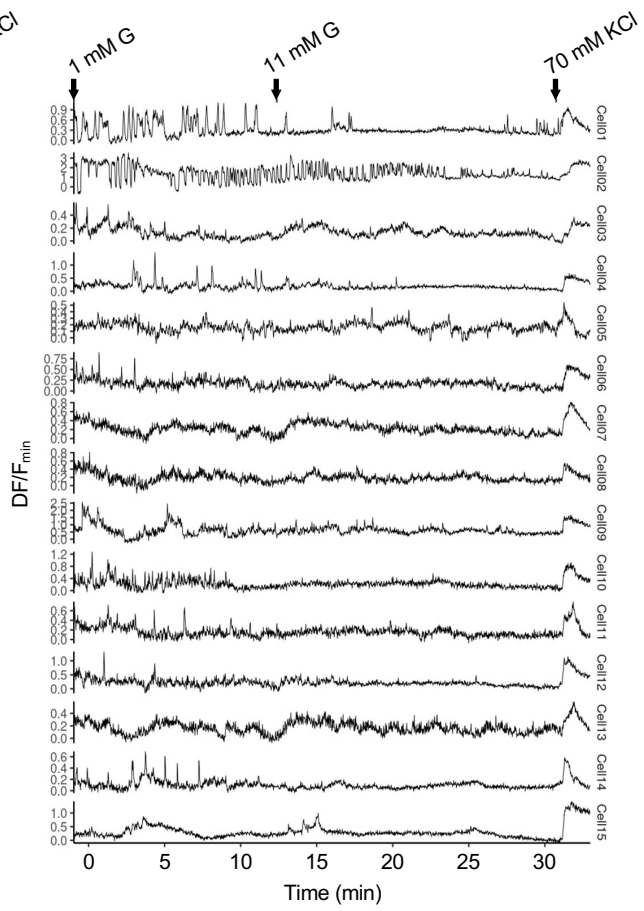

**Supplementary Figure 6.**

Ca<sup>2+</sup> imaging of human islets incubated at either 5.5 mM glucose or 16.7 mM glucose for 3 days. A representative of 4 different preparations is shown. G, glucose.

| Gene         | <i>Kcnj11<sup>fl/fl</sup></i> Mean expression $\pm$ SEM |            | $\beta$ <i>Kcnj11<sup>-/-</sup></i> Mean expression $\pm$ SEM |            |
|--------------|---------------------------------------------------------|------------|---------------------------------------------------------------|------------|
| GPCR related |                                                         |            |                                                               |            |
| Gnas         | 749.031758                                              | 14.7104021 | 750.307795                                                    | 28.37916   |
| Gna11        | 38.0001667                                              | 0.72078354 | 39.2537                                                       | 0.34449399 |
| Gna12        | 14.8660333                                              | 1.10121255 | 18.8792667                                                    | 0.39277684 |
| Gna13        | 15.1619333                                              | 0.16589239 | 17.0882667                                                    | 0.21151676 |
| Gna14        | 4.78411                                                 | 1.08896818 | 5.35930333                                                    | 0.20421953 |
| Gna15        | 0.27455967                                              | 0.08582774 | 0.218103                                                      | 0.04618666 |
| Gnao1        | 59.1486667                                              | 2.7108598  | 61.8515333                                                    | 4.67327937 |
| Gnaq         | 20.4897333                                              | 0.07836879 | 21.0624333                                                    | 0.50064865 |
| Gnal         | 1.676353                                                | 0.18865026 | 1.66360463                                                    | 0.08618024 |
| Plcb1        | 3.81703667                                              | 0.18337697 | 3.60878767                                                    | 0.2119466  |
| Plcb4        | 6.81506                                                 | 0.40195147 | 6.31416                                                       | 0.31968427 |
| Plcd3        | 1.026049                                                | 0.2813006  | 1.42669667                                                    | 0.18913105 |
| Plcd4        | 0.06440788                                              | 0.00816251 | 0.0696659                                                     | 0.01465823 |
| Plce1        | 0.52324867                                              | 0.05981629 | 0.74805067                                                    | 0.03355272 |
| Plch1        | 3.60709502                                              | 0.09929683 | 2.80030882                                                    | 0.11247062 |
| Plch2        | 0.03176255                                              | 0.00787383 | 0.04808869                                                    | 0.00642488 |
| Plcg1        | 11.4427667                                              | 0.1214957  | 11.2961333                                                    | 0.14786193 |
| Plcg2        | 4.57236333                                              | 0.88218329 | 4.81139667                                                    | 0.48607586 |
| Plcz1        | 0                                                       | 0          | 0.02360743                                                    | 0.01189371 |
| Arrb1        | 2.46785967                                              | 0.31857379 | 3.848573                                                      | 0.44926491 |
| Arrb2        | 14.0173465                                              | 0.17072458 | 14.934537                                                     | 0.60017795 |
| Ramp1        | 3.35396974                                              | 0.32160288 | 3.34732836                                                    | 0.03844908 |
| Ramp2        | 14.8932667                                              | 0.79842671 | 12.7177333                                                    | 0.31823338 |
| Ramp3        | 6.45109                                                 | 0.4947469  | 9.70433333                                                    | 0.01427167 |
| Prkca        | 9.70501                                                 | 0.30529096 | 8.24053667                                                    | 0.34553016 |
| Prkcb        | 16.7486333                                              | 0.87029874 | 12.1067                                                       | 0.92261114 |
| Prkcd        | 11.0045667                                              | 0.83834872 | 13.5210333                                                    | 0.79920683 |
| Prkdbp       | 10.21931                                                | 0.6400495  | 14.4586667                                                    | 1.55415152 |
| Prkce        | 9.64198                                                 | 0.45964908 | 9.93367333                                                    | 0.28777377 |
| Prkch        | 2.49266                                                 | 0.04564839 | 3.47503667                                                    | 0.07478078 |
| Prkci        | 9.78932                                                 | 0.67494858 | 10.7620667                                                    | 0.48037556 |
| Prkcq        | 0.03880747                                              | 0.01970633 | 0.04209333                                                    | 0.01096537 |
| Prkcz        | 6.61598645                                              | 0.54347562 | 6.8318917                                                     | 0.13523535 |
| Prkd1        | 5.32628333                                              | 0.27746296 | 5.03886                                                       | 0.16310457 |
| Prkd2        | 5.872121                                                | 0.32754099 | 6.77944667                                                    | 0.27649392 |
| Prkd3        | 3.80609782                                              | 0.1622822  | 4.82579645                                                    | 0.46191065 |
| Marcks       | 35.2647                                                 | 1.84315582 | 39.2662                                                       | 3.27668547 |
| Marcks1      | 21.5779667                                              | 1.58049294 | 30.7245                                                       | 4.04168941 |

Supplementary Table 1. Gene expression of select genes from RNA sequencing of isolated islets. Data presented as Fragments Per Kilobase Million (FPKM) values.

| Gene                       | <i>Kcnj11<sup>fl/fl</sup></i> Mean expression ± SEM |            | $\beta$ <i>Kcnj11<sup>-/-</sup></i> Mean expression ± SEM |            |
|----------------------------|-----------------------------------------------------|------------|-----------------------------------------------------------|------------|
| Calcium signalling related |                                                     |            |                                                           |            |
| Cacna1c                    | 6.30037034                                          | 0.11882735 | 6.41105567                                                | 0.33203118 |
| Cacna1d                    | 13.546383                                           | 0.59922269 | 12.8841347                                                | 0.98549134 |
| Cacna1b                    | 0.969014                                            | 0.09338965 | 0.857772                                                  | 0.07374755 |
| Cacna1a                    | 7.15704677                                          | 0.22081247 | 8.24843512                                                | 0.16008255 |
| Cacna1e                    | 0.056299                                            | 0.0113669  | 0.04189657                                                | 0.00645374 |
| Cacna1g                    | 1.06794192                                          | 0.2827902  | 1.62180844                                                | 0.03188473 |
| Cacna1h                    | 1.18034874                                          | 0.08142341 | 1.37067903                                                | 0.0776692  |
| Cacna1f                    | 0.144563                                            | 0.03034    | 0.0881116                                                 | 0.00878618 |
| Cacna1i                    | 0.21841867                                          | 0.00263237 | 0.11480267                                                | 0.01104132 |
| Cacna1s                    | 0                                                   | 0          | 0.00889776                                                | 0.00889776 |
| Itpr2                      | 2.09077043                                          | 0.12167004 | 2.02408853                                                | 0.10904849 |
| Itpr3                      | 20.2312667                                          | 2.31749487 | 20.8033333                                                | 1.9515953  |
| Ryr1                       | 0.00266587                                          | 0.00163106 | 0.0072401                                                 | 0.00050369 |
| Ryr2                       | 0.0311145                                           | 0.00376435 | 0.02969913                                                | 0.00409268 |
| Ryr3                       | 0.28168467                                          | 0.04622473 | 0.312295                                                  | 0.01355465 |
| Insulin exocytosis related |                                                     |            |                                                           |            |
| Syt1                       | 1.1260048                                           | 0.08466525 | 1.00243656                                                | 0.10286738 |
| Syt2                       | 1.37352333                                          | 0.1410292  | 1.05450533                                                | 0.06892947 |
| Syt3                       | 3.75955396                                          | 0.39076042 | 2.84502821                                                | 0.30424691 |
| Syt4                       | 66.6418333                                          | 2.26609592 | 44.3242667                                                | 2.52355767 |
| Syt5                       | 65.0657667                                          | 1.84032724 | 51.9170667                                                | 4.19214083 |
| Syt6                       | 0.61380824                                          | 0.09533097 | 0.75593706                                                | 0.0478121  |
| Syt7                       | 44.1628833                                          | 3.07022645 | 51.44944                                                  | 4.05803605 |
| Syt8                       | 0.37011427                                          | 0.02822546 | 0.45736633                                                | 0.07128555 |
| Syt9                       | 5.55106667                                          | 0.57890178 | 6.12555667                                                | 0.13802355 |
| Syt11                      | 17.8345                                             | 1.20915414 | 18.3806333                                                | 0.7469996  |
| Syt12                      | 1.69628333                                          | 0.31557571 | 2.22527                                                   | 0.28605027 |
| Syt13                      | 277.286                                             | 10.7433908 | 269.107                                                   | 16.1853407 |
| Syt15                      | 0.31281649                                          | 0.11903333 | 0.44735849                                                | 0.05162005 |
| Syt16                      | 0.959064                                            | 0.0575638  | 1.33115                                                   | 0.1402433  |
| Syt17                      | 0.59392167                                          | 0.07426157 | 1.12580333                                                | 0.04126824 |
| Syt14                      | 7.87552954                                          | 0.18311097 | 7.0400608                                                 | 0.32147694 |
| Syt11                      | 11.68446                                            | 1.52864463 | 13.0959667                                                | 0.5838311  |
| Syt13                      | 1.14828471                                          | 0.19443652 | 1.26691992                                                | 0.12123522 |
| Syt12                      | 1.57551874                                          | 0.23357828 | 1.71138303                                                | 0.08188202 |
| Syt14                      | 46.78565                                            | 3.52021007 | 36.9639667                                                | 4.61228365 |
| Syt15                      | 8.78606                                             | 0.38846215 | 9.68246333                                                | 0.4133551  |

Supplementary Table 1. Continued.



| Gene                       | <i>Kcnj11<sup>fl/fl</sup></i> Mean expression ± SEM |            | <i>βKcnj11<sup>-/-</sup></i> Mean expression ± SEM |            |
|----------------------------|-----------------------------------------------------|------------|----------------------------------------------------|------------|
| Calcium signalling related |                                                     |            |                                                    |            |
| Snap23                     | 23.6595315                                          | 1.13094684 | 24.1327189                                         | 0.44192978 |
| Snap25                     | 64.3516267                                          | 2.73829682 | 58.0115567                                         | 4.49762581 |
| Snap29                     | 13.8738                                             | 0.06454218 | 13.7824                                            | 0.08427718 |
| Snap91                     | 5.88476765                                          | 0.40659606 | 4.52530957                                         | 0.33326221 |
| Snap47                     | 47.4445                                             | 2.10184045 | 45.9771667                                         | 1.98716519 |
| Syncrip                    | 27.60384                                            | 1.77039921 | 29.2430333                                         | 0.25178385 |
| Stx11                      | 1.36381614                                          | 0.11014383 | 1.95773807                                         | 0.18345193 |
| Stx12                      | 45.5340667                                          | 0.64579042 | 45.2485667                                         | 0.60917636 |
| Stx16                      | 17.2164367                                          | 1.27847085 | 16.9516833                                         | 0.2283938  |
| Stx17                      | 5.03813333                                          | 0.10587266 | 5.22482                                            | 0.06965942 |
| Stx19                      | 0.706988                                            | 0.1217035  | 0.524813                                           | 0.02548468 |
| Stx1a                      | 6.06028                                             | 0.89269757 | 6.37682333                                         | 0.56827027 |
| Stx1b                      | 0.18394933                                          | 0.02928766 | 0.38449833                                         | 0.09937136 |
| Stx2                       | 5.6896945                                           | 0.37461595 | 6.261027                                           | 0.08755054 |
| Stx3                       | 18.6467859                                          | 0.29741893 | 17.8529243                                         | 0.55815181 |
| Stx4a                      | 34.0596                                             | 1.29609709 | 34.6238667                                         | 1.37854661 |
| Stx5a                      | 39.3301333                                          | 0.60237342 | 39.8474                                            | 0.71439962 |
| Stx6                       | 23.4911667                                          | 0.13902561 | 24.1856                                            | 0.15499595 |
| Stx7                       | 51.5431667                                          | 2.57896419 | 47.8514333                                         | 1.21082165 |
| Stx8                       | 6.0993                                              | 0.28002652 | 5.91382667                                         | 0.12649572 |
| Stxbp1                     | 63.5885767                                          | 0.33321993 | 54.1309667                                         | 2.98807181 |
| Stxbp2                     | 26.9809                                             | 1.13356556 | 30.1321667                                         | 0.57051692 |
| Stxbp3a                    | 15.9626333                                          | 0.07143567 | 15.9374333                                         | 0.53531134 |
| Stxbp4                     | 2.37924                                             | 0.15190442 | 2.37472333                                         | 0.04549559 |
| Stxbp5                     | 7.65513667                                          | 0.28543223 | 7.06949667                                         | 0.20628953 |
| Stxbp5l                    | 1.0967041                                           | 0.05158436 | 1.05299796                                         | 0.09057104 |
| Stxbp6                     | 7.60512667                                          | 0.1827278  | 7.43650667                                         | 0.43178006 |
| Stx18                      | 20.1471567                                          | 0.38424876 | 22.4075823                                         | 1.06562496 |
| Stxbp3b                    | 0.33493967                                          | 0.08146236 | 0.19298267                                         | 0.01311735 |
| Vamp1                      | 2.74093067                                          | 0.12933485 | 2.56272                                            | 0.13907504 |
| Vamp2                      | 72.5185333                                          | 2.61568687 | 66.7171667                                         | 5.33477436 |
| Vamp3                      | 41.4207667                                          | 0.55911009 | 43.7489                                            | 0.75560626 |
| Vamp4                      | 11.2842867                                          | 1.32317972 | 9.20977667                                         | 0.26492122 |
| Vamp5                      | 2.42319                                             | 0.27548372 | 2.763446                                           | 0.14954144 |
| Vamp8                      | 126.016                                             | 4.35416402 | 134.148                                            | 1.26169344 |
| Vapa                       | 65.5585667                                          | 1.77361254 | 73.0442                                            | 1.37499639 |
| Vapb                       | 25.8023                                             | 0.28712524 | 23.7327667                                         | 0.80458609 |

Supplementary Table 1. Continued.

| Antibody                                                     | Company           | Catalogue number |
|--------------------------------------------------------------|-------------------|------------------|
| Guinea pig anti-insulin                                      | Dako              | AO564            |
| Mouse anti-glucagon                                          | Zymed             | A0565            |
| ECL anti-rabbit IgG                                          | GE Healthcare     | NA934V           |
| ECL anti-mouse IgG                                           | GE Healthcare     | NA931V           |
| Phospho-(Ser) PKC Substrate                                  | Cell signalling   | 2261             |
| Anti G $\alpha_{s/oil}$ (A-5)                                | Santa Cruz        | SC-55545         |
| Anti G $\alpha_q$ (10)                                       | Santa Cruz        | SC-136181        |
| $\beta$ -Actin                                               | Cell signalling   | 4967             |
| Bacterial Strains                                            |                   |                  |
| DH5 $\alpha$ Competent Cells                                 | Invitrogen        | 18258012         |
| <b>Chemical reagents, Peptides, and Recombinant Proteins</b> |                   |                  |
| GLP-1(Human)                                                 | Peptide institute | 4344-V           |
| GIP (Human)                                                  | Peptide institute | 4178-V           |
| YM-254890                                                    | Wako              | 257-00631        |
| Sitagliptin phosphate                                        | Sigma-Aldrich     | 654671-77-9      |
| Liraglutide (Victoza)                                        | Novo Nordisk      | 204656-20-2      |
| MK-2305                                                      | Merck             | N/A              |
| Carbamylcholine chloride (Carbachol)                         | Nacalai Tesque    | 51-83-2          |
| Palmitate                                                    | Wako              | 165-00102        |
| IBMX                                                         | Sigma             | 28822-58-4       |
| Tolbutamide                                                  | Sigma             | 64-77-7          |
| Glibenclamide                                                | Sigma             | 10238-21-8       |
| Fura-2-AM                                                    | Dojindo           | 343-05401        |
| MDL-12, 330A hydrochloride                                   | Sigma             | M182-59          |
| Exendin-(9-39)                                               | Abcam             | Ab141101         |
| Bisindolylmaleimide-1 (BIM-1)                                | Millipore         | 133052-90-1      |
| DAPI                                                         | Dojindo           | 28718-90-3       |
| Lipofectamine 2000                                           | Invitrogen        | 11668-019        |
| Effectene Transfection Reagent                               | Qiagen            | 301427           |
| High glucose Dulbecco's Modified Eagles Medium (DMEM)        | Sigma             | D5796            |
| Low glucose DMEM                                             | Sigma             | D5030            |
| Rosewell Park Memorial Institute (RPMI)-1640                 | Sigma             | R8758            |
| Glucose free RPMI medium                                     | Gibco             | 11879-020        |
| Fetal Bovine Serum                                           | Bio west          | S1400-500        |
| Penicillin and Streptomycin                                  | Wako              | 168-23191        |
| Protease inhibitor cocktail                                  | Sigma-Aldrich     | 11697498001      |
| Phosphatase inhibitor cocktail                               | Roche Diagnostics | 04906837001      |
| Dimethyl sulfoxide (DMSO)                                    | Sigma-Aldrich     | 24893881         |
| Collagenase P                                                | Roche Diagnostics | 11249002001      |
| Aprotinin                                                    | Wako              | 010-11834        |
| KR-62436 hydrate (DPP4 inhibitor)                            | Sigma-Aldrich     | 761414-79-3      |
| Commercial assays                                            |                   |                  |
| Insulin Ultra Sensitive HTRF Assay kit                       | Cisbio            | 62IN2PEH         |
| cAMP Gs dynamic kit                                          | Cisbio            | 62AM4PEC         |
| IP-One HTRF kit                                              | Cisbio            | 62IPAPEB         |
| Morinaga Ultra Sensitive Mouse Insulin ELISA Kit             | MORINAGA          | M1104            |
| GLP-1 High Sensitive ELISA Kit                               | Wako              | 299-75501        |

Supplementary Table 2. Reagents and resources.

|                                               |                          |             |
|-----------------------------------------------|--------------------------|-------------|
| GLP-1, Active form (High Sensitive) Assay Kit | IBL                      | 27700       |
| Rat/Mouse (Total) GIP ELISA Kit               | Millipore                | EZRMGIP-55K |
| Mouse GIP (Active) ELISA Kit                  | Wako                     | 299-73801   |
| Mercodia Glucagon ELISA                       | Mercodia                 | 10-1271-01  |
| BCA protein assay kit                         | Thermo Fisher Scientific | 23227       |
| RNA extraction kit                            | Qiagen                   | 74106       |
| DNA SimplePrep reagent                        | Takara Bio               | 9180        |
| ReverTra Ace qPCR RT kit                      | Toyobo                   | FSQ-101     |
| Experimental mouse models                     |                          |             |
| C57BL/6JJcl mice                              | Japan CLEA               | C57BL/6JJcl |
| KK-Ay/TaJcl mice                              | Japan CLEA               | KK-Ay/TaJcl |
| KK/TaJcl mice                                 | Japan CLEA               | KK/TaJcl    |

Supplementary Table 2. Continued.

| Islet Preparation                                     | 1                     | 2                       | 3                       | 4                       | 5              | 6       | 7           | 8           | 9           |
|-------------------------------------------------------|-----------------------|-------------------------|-------------------------|-------------------------|----------------|---------|-------------|-------------|-------------|
| Unique Identifier                                     | HP1930                | HP1933                  | HP1935                  | HP2001                  | HP2002         | H2366   | R344        | HP-19311-01 | H2491       |
| Donor age (years)                                     | 44                    | 41                      | 42                      | 49                      | 51             | 72      | 59          | 29          | 71          |
| Donor sex (M/F)                                       | M                     | M                       | F                       | M                       | M              | M       | M           | F           | M           |
| Donor BMI (kg/m <sup>2</sup> )                        | 26.1                  | 24                      | 37                      | 31                      | 25             | 32.7    | 27.5        | 26.2        | 22.4        |
| Donor HBA1c or other measure of blood glucose control | 5.4                   | 5.5                     | 5.8                     | nd                      | 5.5            |         |             | 5.1         | 5.9         |
| Islet isolation centre                                | Oxford                | Oxford                  | Oxford                  | Oxford                  | Oxford         | Uppsala | Alberta ADI | Prodo labs  | Uppsala     |
| Donor history of diabetes                             | no                    | no                      | no                      | no                      | no             | no      | no          | no          |             |
| Donor cause of death                                  | Road-traffic accident | intracranial hemorrhage | intracranial hemorrhage | intracranial hemorrhage | cardiac arrest |         |             | stroke      | Brain death |
| Warm ischaemia time                                   |                       |                         |                         |                         |                | 36h     |             | 72h         |             |
| Cold ischaemia time                                   | 7                     | 5.75                    | 9.75                    | 6.5                     | 5.5            | 6h      | 24h         | 36h         | 22h         |
| Estimated purity (%)                                  | 80                    | 50                      | 85                      | 60                      | 70             | 97      | 95          | 90-95       | 96          |
| Estimated viability (%)                               | 72                    | 81                      | 76                      | 71                      | 85             | 50      |             | 95          |             |

Supplementary Table 3. Information on human donors for islet studies.

| Gene name                                                                             | Source                   | Identifier                   |
|---------------------------------------------------------------------------------------|--------------------------|------------------------------|
| <i>Abcc8</i>                                                                          | Thermo Fisher Scientific | Mm00803450_m1                |
| <i>Adcy1</i>                                                                          | Thermo Fisher Scientific | Mm01187829_m1                |
| <i>Adcy2</i>                                                                          | Thermo Fisher Scientific | Mm00467874_m1                |
| <i>Adcy3</i>                                                                          | Thermo Fisher Scientific | Mm00460371_m1                |
| <i>Adcy4</i>                                                                          | Thermo Fisher Scientific | Mm00475491_m1                |
| <i>Adcy5</i>                                                                          | Thermo Fisher Scientific | Mm00674122_m1                |
| <i>Adcy6</i>                                                                          | Thermo Fisher Scientific | Mm00475772_m1                |
| <i>Adcy7</i>                                                                          | Thermo Fisher Scientific | Mm00545780_m1                |
| <i>Adcy8</i>                                                                          | Thermo Fisher Scientific | Mm00507722_m1                |
| <i>Adcy9</i>                                                                          | Thermo Fisher Scientific | Mm00507743_m1                |
| <i>Gapdh</i>                                                                          | Thermo Fisher Scientific | Mm99999915_g1                |
| <i>Glp-1r</i>                                                                         | Thermo Fisher Scientific | Mm00445292_m1                |
| <i>Gipr</i>                                                                           | Thermo Fisher Scientific | Mm01316351_g1                |
| <i>Ins1</i>                                                                           | Thermo Fisher Scientific | Mm01259683_g1                |
| <i>Ins2</i>                                                                           | Thermo Fisher Scientific | Mm00731595_gH                |
| <i>Kcnj11</i>                                                                         | Thermo Fisher Scientific | Mm00440050_s1                |
| <i>Pde1c</i>                                                                          | Thermo Fisher Scientific | Mm00478051_m1                |
| <i>Pde3a</i>                                                                          | Thermo Fisher Scientific | Mm00479581_m1                |
| <i>Pde3b</i>                                                                          | Thermo Fisher Scientific | Mm01271639_m1                |
| <i>Pdce4a</i>                                                                         | Thermo Fisher Scientific | Mm00480071_m1                |
| <i>Pde4b</i>                                                                          | Thermo Fisher Scientific | Mm00480166_m1                |
| <i>Pde4c</i>                                                                          | Thermo Fisher Scientific | Mm01343237_m1                |
| <i>Pde4d</i>                                                                          | Thermo Fisher Scientific | Mm00456879_m1                |
| <i>Pde10a</i>                                                                         | Thermo Fisher Scientific | Mm00449329_m1                |
| <i>Kcnj11<sup>fl/fl</sup></i> and <i>Kcnj11<sup>-/-</sup></i> mice genotyping primers |                          |                              |
| Gene                                                                                  | Forward                  | Reverse                      |
| <i>Kcnj11</i>                                                                         | ATGTAGAGTGGTGGGGTGCG     | CCAAGACGGGCTTTGAGACC         |
| <i>Rat insulin II promoter Cre</i>                                                    | CCGCAGAACCTGAAGATGTTCCG  | CAGATTACGTATATCCTGGCAGG<br>G |
| Genotyping primers for CRISPR/Cas9-mediated knock out $\beta$ -cell lines             |                          |                              |
| Gene                                                                                  | Forward                  | Reverse                      |
| <i>Kcnj11</i>                                                                         | TAACCTGAGGAGAGGGCTCA     | GCCAGATGAAAAGGAGTGGA         |

Supplementary Table 4. PCR primers.

**Supplementary Methods.**

*RNA sequencing.* RNA samples were processed as fragments per kilobase of transcript per million mapped reads (FPKM), and determined by the RNA-sequencing (RNA-seq) service provider Macrogen (Japan), who also mapped trimmed reads to the *Mus musculus* reference genome using AnnoOnly(-G) Transcriptome Resequencing NGS Advanced and then performed transcript assembly using Cufflinks-G. Data were log transformed and quantile normalization was performed with Pre-process Core's R library by Macrogen. Samples with at least one FPKM value of 0 were removed from consideration.
